# Supplementary material for: Debris cover effects on energy and mass balance of Batura Glacier in the Karakoram over the past 20 years
Source: Copernicus journal article supplement (doi:10.5194/hess-28-2023-2024), 2024-05-07
Supplement: Supplementary file 1 [file hess-28-2023-2024-supplement.pdf]

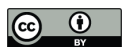

*Supplement of*

## **Debris cover effects on energy and mass balance of Batura Glacier in the Karakoram over the past 20 years**

**Yu Zhu et al.**

*Correspondence to:* Shiyin Liu ([shiyin.liu@ynu.edu.cn](mailto:shiyin.liu@ynu.edu.cn))

The copyright of individual parts of the supplement might differ from the article licence.

## Supplementary Tables

**Table S1** Technical characteristics of the sensors at Batura Glacier at AWS1 and AWS2.

| AWS  | Variable            | Instrument              | Accuracy             |
|------|---------------------|-------------------------|----------------------|
| AWS1 | Air temperature     | Campbell CS215          | 0.9 °C (-40~60 °C)   |
|      | Relative humidity   | Campbell CS215          | 4% (0~100%)          |
|      | Radiation           | Campbell CNR4-L         | 5% (daily totals)    |
|      | Wind speed          | Young                   | ± 0.3m/s (-50~50 °C) |
|      | Wind direction      | Young                   | ± 3° (-50~50 °C)     |
|      | Rain gauge          | T-200B                  | 0.1% FS (-40~60 °C)  |
| AWS2 | Air temperature     | Zhiyuxiang MULTI-7P     | 0.3 °C (-40~60 °C)   |
|      | Air pressure        | Zhiyuxiang MULTI-7P     | 0.3hpa               |
|      | Relative humidity   | Zhiyuxiang MULTI-7P     | 2% (0~100%)          |
|      | Radiation           | Jinzhong Sunshine TBB-2 | 5% (daily totals)    |
|      | Wind speed          | Zhiyuxiang MULTI-7P     | 0.3m/s (-50~50 °C)   |
|      | Wind direction      | Zhiyuxiang MULTI-7P     | 3° (-50~50 °C)       |
|      | Surface temperature | Campbell TP107          | 0.3°                 |

**Table S2** The primary parameters in the energy balance model.

| Parameter                                | Setting value         | Sampled values for calibrated parameters (min, max, step) | Reference                               |
|------------------------------------------|-----------------------|-----------------------------------------------------------|-----------------------------------------|
| firm albedo                              | 0.53                  | 0.53, 0.62, 0.03                                          | (Mölg et al., 2012)                     |
| ice albedo                               | 0.3                   | 0.25, 0.4, 0.05                                           | (Mölg et al., 2012)                     |
| surface roughness length for aged snow   | 6 mm                  | 1.5, 6, 0.5                                               | (Brock et al., 2006; Mölg et al., 2012) |
| surface roughness length for ice         | 2.5 mm                | 0.7, 3.1, 0.6                                             | (Brock et al., 2006; Mölg et al., 2012) |
| fresh snow albedo                        | 0.88                  |                                                           | (Mölg et al., 2012)                     |
| surface roughness length for fresh snow  | 0.24 mm               |                                                           | (Gromke et al., 2011)                   |
| albedo timescale                         | 13 days               |                                                           | (Mölg et al., 2012)                     |
| albedo depth scale                       | 3 cm                  |                                                           | (Mölg et al., 2012)                     |
| temperature threshold of rain/snow ratio | [-0.5~4.5°C]          |                                                           | (Huintjes et al., 2015)                 |
| ice density                              | 550 kg/m <sup>3</sup> |                                                           | (Mölg et al., 2012)                     |
| firm density                             | 875 kg/m <sup>3</sup> |                                                           | (Mölg et al., 2012)                     |
| density of freshly fallen snow           | 250 kg/m <sup>3</sup> |                                                           | (Mölg et al., 2012)                     |
| Surface emission coefficient             | 0.97                  |                                                           | (Bintanja and Van, 1995)                |
| melting temperature                      | 273.15 K              |                                                           | (Mölg et al., 2012)                     |
| bottom temperature                       | 265.15 K              |                                                           | (Mölg et al., 2012; Huintjes, 2014)     |
| thickness of snow layers                 | 2 cm                  |                                                           | (Sauter et al., 2020)                   |
| thickness of glacier ice layers          | 50 cm                 |                                                           | (Sauter et al., 2020)                   |

**Table S3** The key parameters in the energy balance of debris.

| Parameter                                      | Setting value                             | Sampled values for calibrated parameter<br>(min, max, step) | Reference                                  |
|------------------------------------------------|-------------------------------------------|-------------------------------------------------------------|--------------------------------------------|
| debris albedo                                  | 0.13                                      | 0.1, 0.4, 0.03                                              | (Giese et al., 2020; Reid and Brock, 2010) |
| Debris thermal conductivity                    | 0.76 W m <sup>-1</sup> K <sup>-1</sup>    | 0.6, 1.32, 0.08                                             | (Giese et al., 2020; Reid and Brock, 2010) |
| debris density                                 | 1496 kg m <sup>-3</sup>                   |                                                             | (Reid and Brock, 2010)                     |
| debris specific heat capacity                  | 900 J kg <sup>-1</sup> m <sup>-3</sup>    |                                                             | (Reid and Brock, 2010)                     |
| debris volumetric heat capacity                | 1418208 J m <sup>-3</sup> K <sup>-1</sup> |                                                             | (Reid and Brock, 2010)                     |
| ice emissivity                                 | 0.94                                      |                                                             | (Reid and Brock, 2010)                     |
| debris aerodynamic roughness length for debris | 0.016 m                                   |                                                             | (Reid and Brock, 2010)                     |
| debris layer thickness*                        | 0.01                                      |                                                             | (Reid and Brock, 2010)                     |

\*When there are fewer than 10 layers, it is adjusted to have 10 layers with a thickness of total thickness divided by 10 for each layer.

### Supplementary Figures

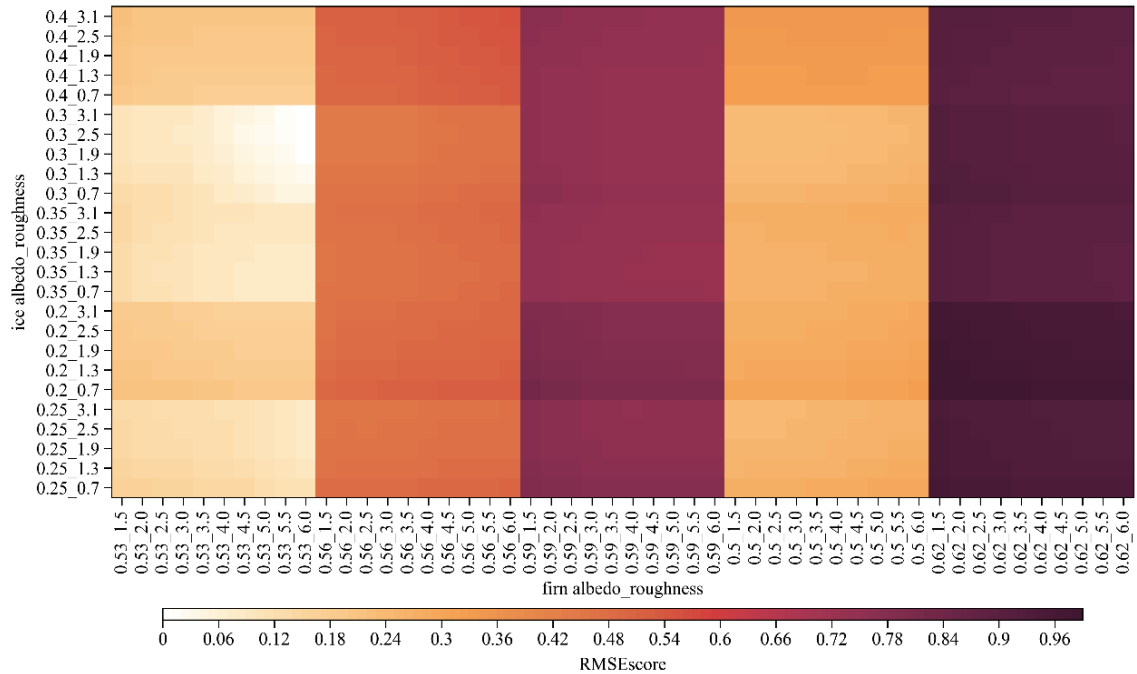

**Figure S1** Heat plots of  $RMSE_{score}$  for the model-inherent calibration at AWS1.

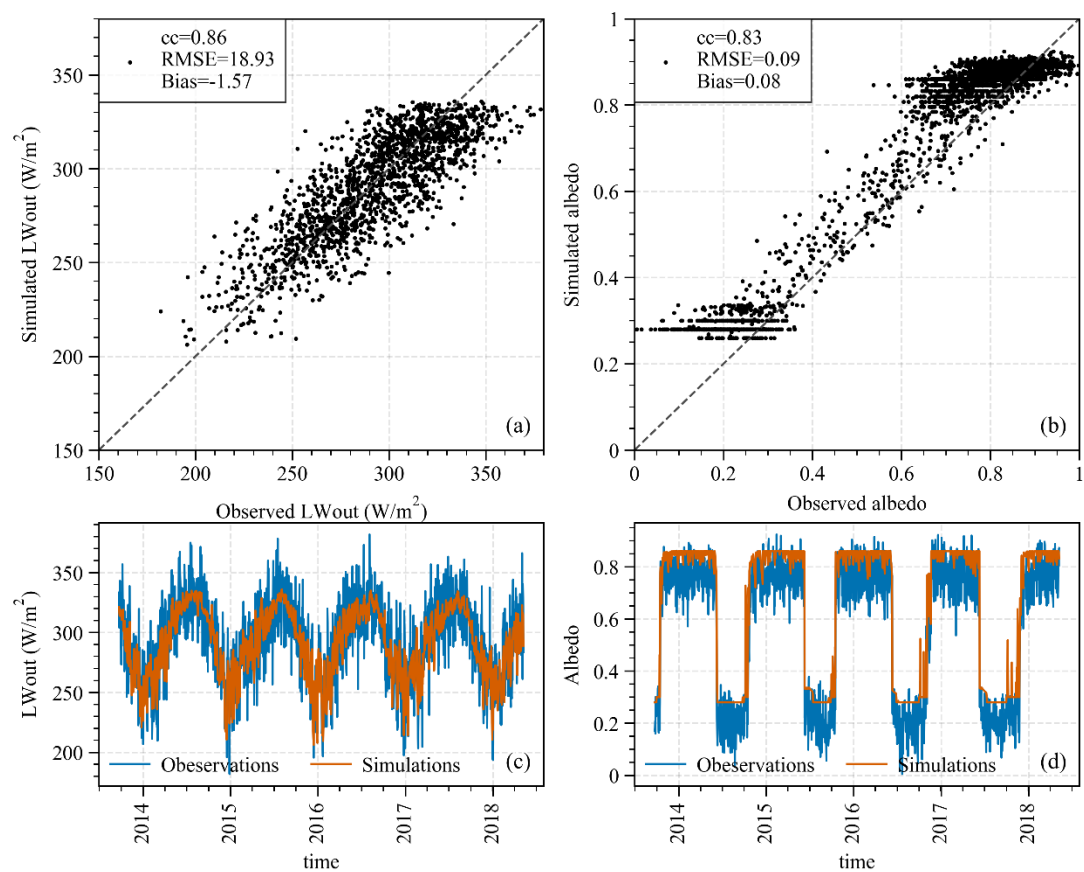

**Figure S2** Comparison of observed and simulated (a), (c) outgoing longwave radiation and (b), (d) albedo at AWS1.

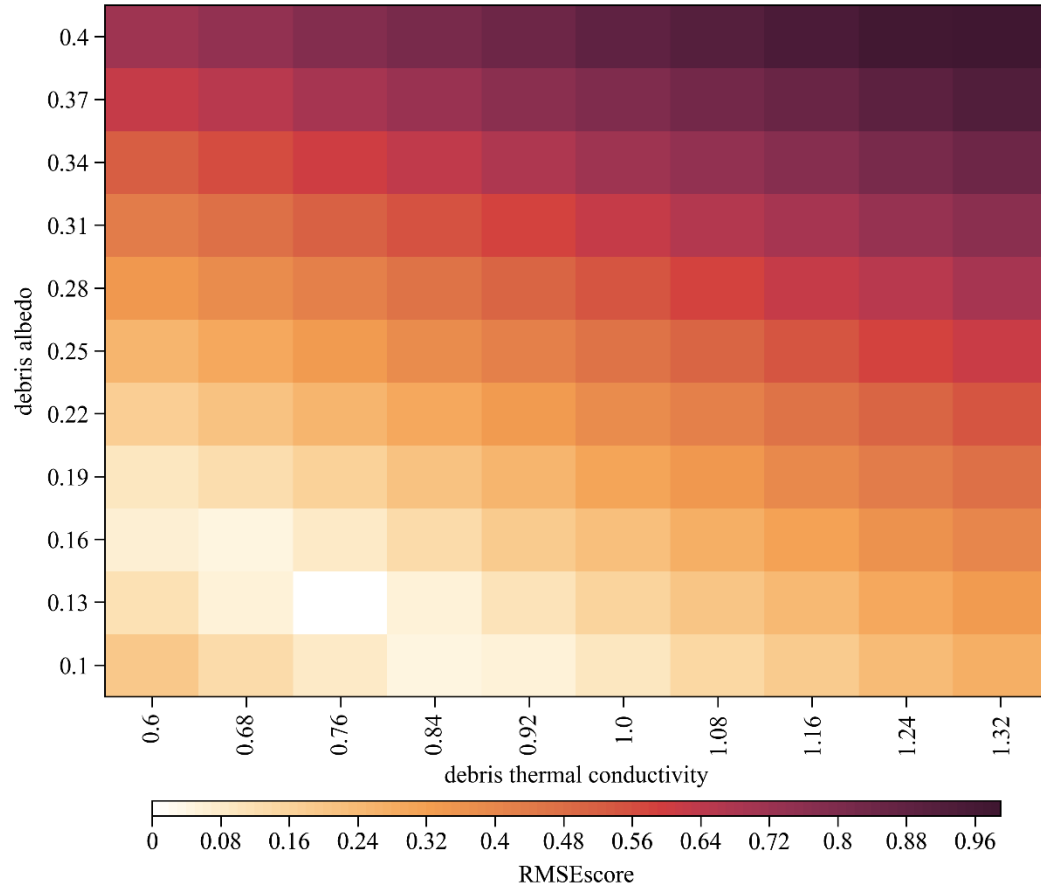

**Figure S3** Heat plots of  $RMSE_{score}$  for the model-inherent calibration at AWS2.

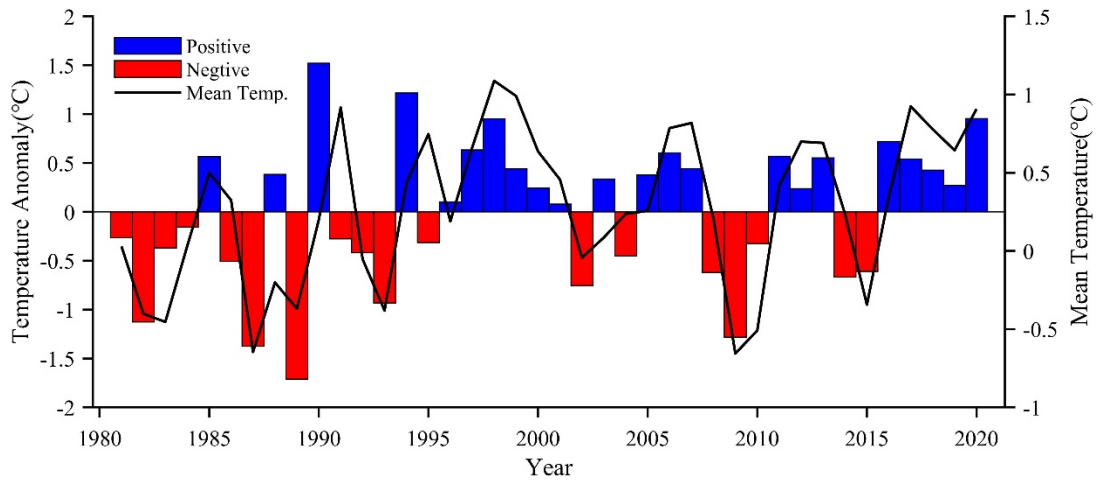

**Figure S4** Average air temperature in Hunza basin from 1980 to 2020 derived from ERA5.

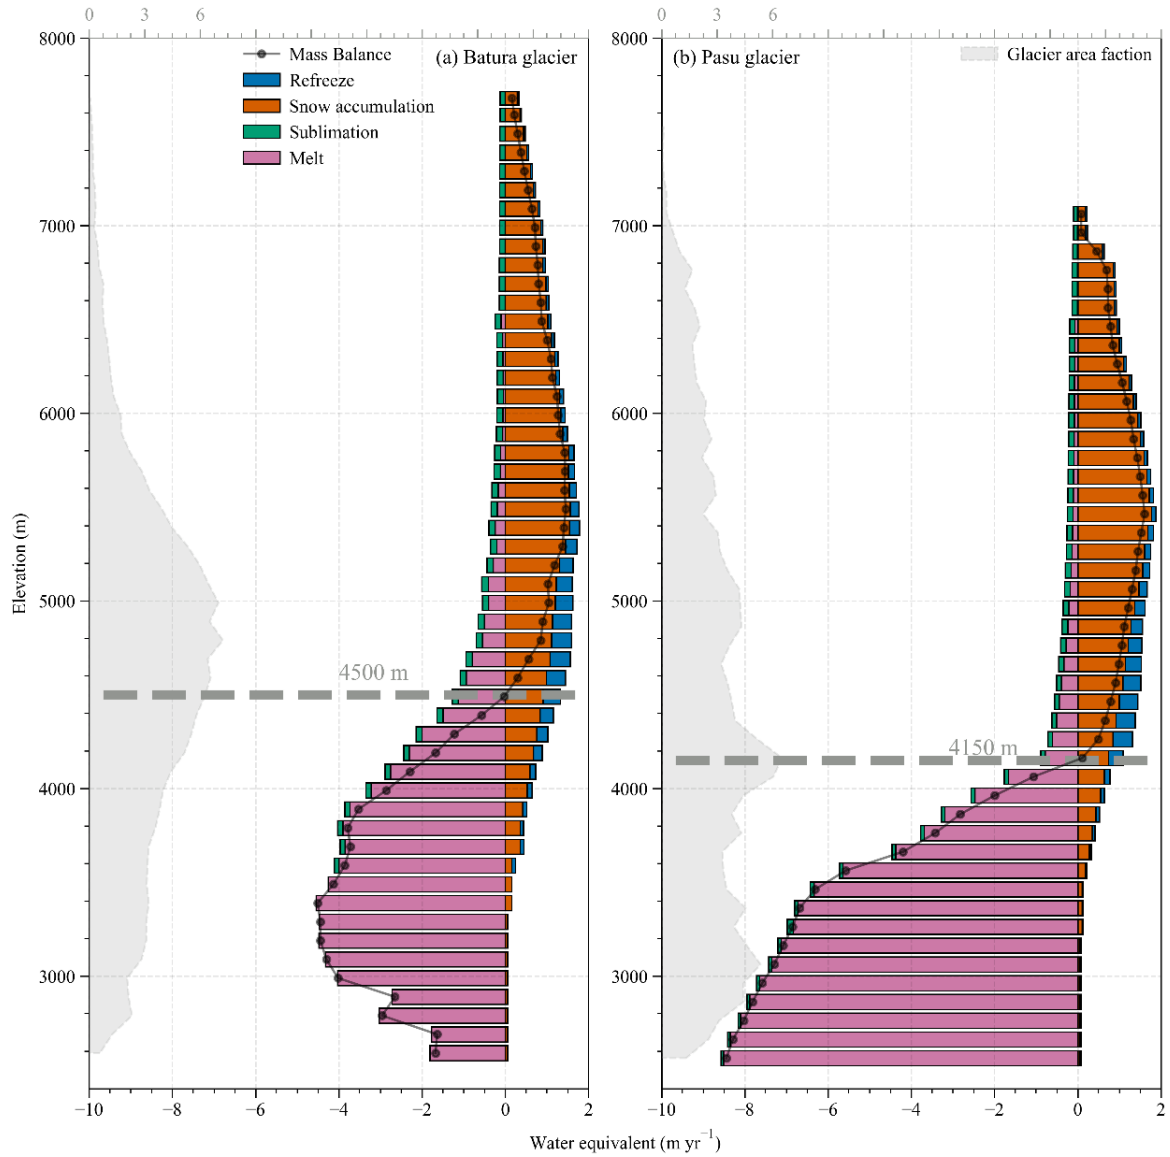

**Figure S5** Characteristics of altitude gradient of components in mass balance. (a) Batura Glacier; (b) Pasu Glacier. The glacier ratio fraction (%) represents proportion of the glacier area in each elevation zone to total area of the glacier.

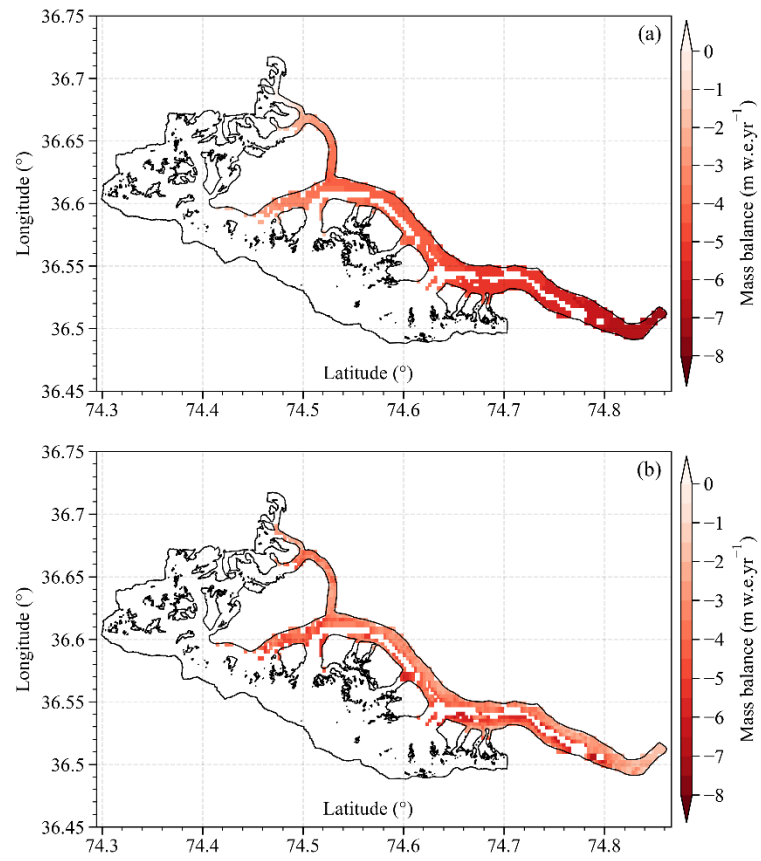

**Figure S6** Spatially-distributed annual ablation with no debris cover (a) and with debris cover (b).

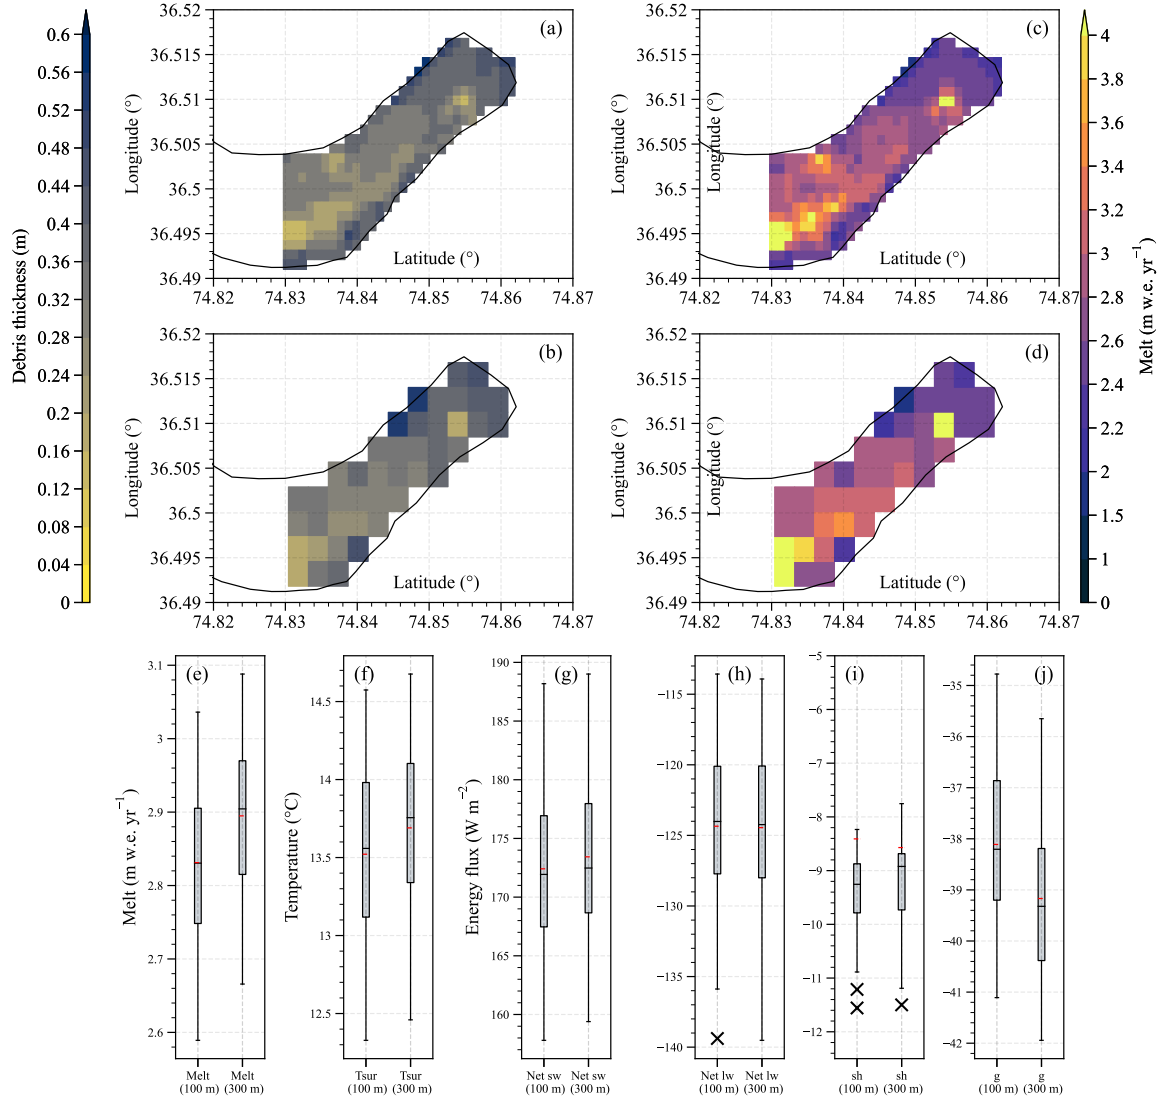

**Figure S7** Comparison on subsurface melt and energy fluxes at a section of the Batura Glacier terminus simulated at two resolutions: 100 m and 300 m. (a) and (b) show the surface debris thickness at 100 meters resolution and 300 m resolution, respectively. (c) and (d) depict subsurface melt at 100 m resolution and 300 m resolution, respectively. (e) to (j) present comparison boxplots for subsurface melt and various energy fluxes at both resolutions. Tsur, Net sw, Net lw, sh, and g represent surface temperature, net shortwave radiation, net longwave radiation, sensible heat flux, and conductive heat flux, respectively. The y-axis labels in (e) to (h) are consistent for ease of comparison. Red lines in (e) to (j) indicate the mean value for each variable.

## References

- Bintanja, R. and Van, D. B., Michiel R.: The Surface Energy Balance of Antarctic Snow and Blue Ice, *Journal of Applied Meteorology*, 34, 902-926, 1995.
- Brock, B. W., Willis, I. C., and Sharp, M. J.: Measurement and parameterization of aerodynamic roughness length variations at Haut Glacier d'Arolla, Switzerland, *Journal of Glaciology*, 52, 281-297,

10.3189/172756506781828746, 2006.

Giese, A., Boone, A., Wagnon, P., and Hawley, R.: Incorporating moisture content in surface energy balance modeling of a debris-covered glacier, *The Cryosphere*, 14, 1555-1577, 10.5194/tc-14-1555-2020, 2020.

Gromke, C., Manes, C., Walter, B., Lehning, M., and Guala, M.: Aerodynamic Roughness Length of Fresh Snow, *Boundary-Layer Meteorology*, 141, 21-34, 10.1007/s10546-011-9623-3, 2011.

Huintjes, E.: Energy and mass balance modelling for glaciers on the Tibetan Plateau : extension, validation and application of a coupled snow and energy balance model, RWTH Aachen University, 2014.

Huintjes, E., Neckel, N., Hochschild, V., and Schneider, C.: Surface energy and mass balance at Purogangri ice cap, central Tibetan Plateau, 2001–2011, *Journal of Glaciology*, 61, 1048-1060, 10.3189/2015JoG15J056, 2015.

Mölg, T., Maussion, F., Yang, W., and Scherer, D.: The footprint of Asian monsoon dynamics in the mass and energy balance of a Tibetan glacier, *The Cryosphere*, 6, 1445-1461, 10.5194/tc-6-1445-2012, 2012.

Reid, T. D. and Brock, B. W.: An energy-balance model for debris-covered glaciers including heat conduction through the debris layer, *Journal of Glaciology*, 56, 903-916, 2010.

Sauter, T., Arndt, A., and Schneider, C.: COSIPY v1.3 – an open-source coupled snowpack and ice surface energy and mass balance model, *Geoscientific Model Development*, 13, 5645-5662, 10.5194/gmd-13-5645-2020, 2020.
